# Supplementary material
Source: publisher figshare collection journal article supplement (https://acs.figshare.com/ndownloader/files/4384786)
Supplement: Supplementary file 1 [file 4384786]

 
data_100515_cd14_3 
 
_audit_creation_method            SHELXL-97 
_chemical_name_systematic 
; 
 ? 
; 
_chemical_name_common             ? 
_chemical_melting_point           ? 
_chemical_formula_moiety          'C30 H38 Cd N4 O6, 2(H2 O)' 
_chemical_formula_sum 
 'C30 H42 Cd N4 O8' 
_chemical_formula_weight          699.09
 
loop_ 
 _atom_type_symbol 
 _atom_type_description 
 _atom_type_scat_dispersion_real 
 _atom_type_scat_dispersion_imag 
 _atom_type_scat_source 
 'C'  'C'   0.0033   0.0016 
 'International Tables Vol C Tables 4.2.6.8 and 6.1.1.4' 
 'H'  'H'   0.0000   0.0000 
 'International Tables Vol C Tables 4.2.6.8 and 6.1.1.4' 
 'N'  'N'   0.0061   0.0033 
 'International Tables Vol C Tables 4.2.6.8 and 6.1.1.4' 
 'Cd'  'Cd'  -0.8075   1.2024 
 'International Tables Vol C Tables 4.2.6.8 and 6.1.1.4' 
 'O'  'O'   0.0106   0.0060 
 'International Tables Vol C Tables 4.2.6.8 and 6.1.1.4' 
 
_symmetry_cell_setting            'Monoclinic' 
_symmetry_space_group_name_H-M    'C 2' 
_symmetry_space_group_name_Hall   'C 2y'
 
loop_ 
 _symmetry_equiv_pos_as_xyz 
 'x, y, z' 
 '-x, y, -z' 
 'x+1/2, y+1/2, z' 
 '-x+1/2, y+1/2, -z' 
 
_cell_length_a                    19.8930(7) 
_cell_length_b                    9.0654(3) 
_cell_length_c                    9.4049(3) 
_cell_angle_alpha                 90.00 
_cell_angle_beta                  99.598(3) 
_cell_angle_gamma                 90.00 
_cell_volume                      1672.32(10) 
_cell_formula_units_Z             2 
_cell_measurement_temperature     293(2) 
_cell_measurement_reflns_used   3156
_cell_measurement_theta_min     3.1863
_cell_measurement_theta_max     29.3107
 
_exptl_crystal_description        BLOCK 
_exptl_crystal_colour            COLORLESS 
_exptl_crystal_size_max           0.44 
_exptl_crystal_size_mid           0.34
_exptl_crystal_size_min           0.20
_exptl_crystal_density_meas       ? 
_exptl_crystal_density_diffrn     1.388 
_exptl_crystal_density_method     'not measured' 
_exptl_crystal_F_000              724 
_exptl_absorpt_coefficient_mu     0.704 
_exptl_absorpt_correction_type    multi-scan'  
_exptl_absorpt_correction_T_min   0.758 
_exptl_absorpt_correction_T_max   0.929
_exptl_absorpt_process_details    
;
CrysAlisPro, Oxford Diffraction Ltd.,
Version 1.171.33.53 (release 17-11-2009 CrysAlis171 .NET)
(compiled Nov 17 2009,16:58:22)
Empirical absorption correction using spherical harmonics,
 implemented in SCALE3 ABSPACK scaling algorithm.
;
 
_exptl_special_details 
; 
 ? 
; 
 
_diffrn_ambient_temperature       293(2) 
_diffrn_radiation_wavelength      0.71073 
_diffrn_radiation_type            MoK\a 
_diffrn_radiation_source          'fine-focus sealed tube' 
_diffrn_radiation_monochromator   graphite 
_diffrn_measurement_device_type   'Xcalibur, Atlas, Gemini ultra' 
_diffrn_measurement_method        '\w scans' 
_diffrn_detector_area_resol_mean  10.3592 
_diffrn_standards_number          ? 
_diffrn_standards_interval_count  ? 
_diffrn_standards_interval_time   ? 
_diffrn_standards_decay_%         ? 
_diffrn_reflns_number             3841 
_diffrn_reflns_av_R_equivalents   0.0177 
_diffrn_reflns_av_sigmaI/netI     0.0312 
_diffrn_reflns_limit_h_min        -21 
_diffrn_reflns_limit_h_max        23 
_diffrn_reflns_limit_k_min        -10 
_diffrn_reflns_limit_k_max        10 
_diffrn_reflns_limit_l_min        -11 
_diffrn_reflns_limit_l_max        9 
_diffrn_reflns_theta_min          3.19 
_diffrn_reflns_theta_max          25.35 
_reflns_number_total              2304 
_reflns_number_gt                 2294 
_reflns_threshold_expression      >2sigma(I) 
 
_computing_cell_refinement        
;
CrysAlisPro, Oxford Diffraction Ltd.,
Version 1.171.33.52 (release 06-11-2009 CrysAlis171 .NET)
(compiled Nov  6 2009,16:24:50)
;
_computing_data_collection        
;
CrysAlisPro, Oxford Diffraction Ltd.,
Version 1.171.33.52 (release 06-11-2009 CrysAlis171 .NET)
(compiled Nov  6 2009,16:24:50)
;
_computing_data_reduction         
;
CrysAlisPro, Oxford Diffraction Ltd.,
Version 1.171.33.52 (release 06-11-2009 CrysAlis171 .NET)
(compiled Nov  6 2009,16:24:50)
;
_computing_molecular_graphics     
;
 OLEX2: a complete structure solution, refinement and analysis program.
 Dolomanov et al., J. Appl. Cryst. (2009). 42, 339-341
;
_computing_publication_material   
;
 OLEX2: a complete structure solution, refinement and analysis program.
 Dolomanov et al., J. Appl. Cryst. (2009). 42, 339-341
;
 
_refine_special_details 
; 
 Refinement of F^2^ against ALL reflections.  The weighted R-factor wR and 
 goodness of fit S are based on F^2^, conventional R-factors R are based 
 on F, with F set to zero for negative F^2^. The threshold expression of 
 F^2^ > 2sigma(F^2^) is used only for calculating R-factors(gt) etc. and is 
 not relevant to the choice of reflections for refinement.  R-factors based 
 on F^2^ are statistically about twice as large as those based on F, and R- 
 factors based on ALL data will be even larger. 
; 
 
_refine_ls_structure_factor_coef  Fsqd  
_refine_ls_matrix_type            full 
_refine_ls_weighting_scheme       calc  
_refine_ls_weighting_details 
 'calc w=1/[\s^2^(Fo^2^)+(0.0199P)^2^+0.0000P] where P=(Fo^2^+2Fc^2^)/3' 
_atom_sites_solution_primary      direct 
_atom_sites_solution_secondary    difmap 
_atom_sites_solution_hydrogens    geom 
_refine_ls_hydrogen_treatment     mixed 
_refine_ls_extinction_method      none 
_refine_ls_extinction_coef        ? 
_refine_ls_abs_structure_details 
 'Flack H D (1983), Acta Cryst. A39, 876-881' 
_refine_ls_abs_structure_Flack    -0.015(18) 
_chemical_absolute_configuration UNK
_refine_ls_number_reflns          2304 
_refine_ls_number_parameters      204 
_refine_ls_number_restraints      4 
_refine_ls_R_factor_all           0.0204 
_refine_ls_R_factor_gt            0.0203 
_refine_ls_wR_factor_ref          0.0410 
_refine_ls_wR_factor_gt           0.0410 
_refine_ls_goodness_of_fit_ref    1.014 
_refine_ls_restrained_S_all       1.014 
_refine_ls_shift/su_max           0.001 
_refine_ls_shift/su_mean          0.000 
 
loop_ 
 _atom_site_label 
 _atom_site_type_symbol 
 _atom_site_fract_x 
 _atom_site_fract_y 
 _atom_site_fract_z 
 _atom_site_U_iso_or_equiv 
 _atom_site_adp_type 
 _atom_site_occupancy 
 _atom_site_symmetry_multiplicity 
 _atom_site_calc_flag 
 _atom_site_refinement_flags 
 _atom_site_disorder_assembly 
 _atom_site_disorder_group 
Cd1 Cd 0.5000 0.3592 0.0000 0.03062(8) Uani 1 2 d S . . 
O1 O 0.31834(17) 0.0011(3) -0.6501(3) 0.0537(9) Uani 1 1 d . . . 
O2 O 0.44189(11) -0.5887(2) -0.82392(19) 0.0588(7) Uani 1 1 d . . . 
O3 O 0.39872(10) -0.4793(3) -1.0244(2) 0.0499(5) Uani 1 1 d . . . 
O4 O 0.31768(13) -0.3828(3) -1.2779(2) 0.0612(6) Uani 1 1 d D . . 
N1 N 0.44105(12) 0.1857(3) -0.1506(2) 0.0414(6) Uani 1 1 d . . . 
N2 N 0.34480(10) -0.1276(5) -0.44046(19) 0.0380(6) Uani 1 1 d . . . 
H2 H 0.3393 -0.2116 -0.4014 0.046 Uiso 1 1 calc R . . 
C1 C 0.39689(17) 0.1164(4) -0.3938(3) 0.0521(8) Uani 1 1 d . . . 
H1 H 0.3892 0.1417 -0.4910 0.063 Uiso 1 1 calc R . . 
C2 C 0.42943(18) 0.2117(4) -0.2930(3) 0.0560(9) Uani 1 1 d . . . 
H2A H 0.4446 0.3008 -0.3251 0.067 Uiso 1 1 calc R . . 
C3 C 0.41954(15) 0.0567(3) -0.1090(3) 0.0433(7) Uani 1 1 d . . . 
H3 H 0.4266 0.0359 -0.0108 0.052 Uiso 1 1 calc R . . 
C4 C 0.38745(15) -0.0482(3) -0.2018(3) 0.0417(7) Uani 1 1 d . . . 
H4 H 0.3739 -0.1375 -0.1667 0.050 Uiso 1 1 calc R . . 
C5 C 0.37556(14) -0.0187(3) -0.3489(3) 0.0368(6) Uani 1 1 d . . . 
C6 C 0.32191(13) -0.1175(5) -0.5874(3) 0.0374(10) Uani 1 1 d . . . 
C7 C 0.3055(2) -0.2635(5) -0.6617(4) 0.0352(9) Uani 1 1 d . . . 
H7 H 0.2821 -0.3252 -0.5996 0.042 Uiso 1 1 calc R . . 
C8 C 0.25904(15) -0.2486(3) -0.8086(3) 0.0460(8) Uani 1 1 d . . . 
H8A H 0.2128 -0.2782 -0.8018 0.055 Uiso 1 1 calc R . . 
H8B H 0.2583 -0.1474 -0.8423 0.055 Uiso 1 1 calc R . . 
C9 C 0.28923(15) -0.3507(4) -0.9116(3) 0.0483(8) Uani 1 1 d . . . 
H9A H 0.2536 -0.4094 -0.9679 0.058 Uiso 1 1 calc R . . 
H9B H 0.3116 -0.2933 -0.9772 0.058 Uiso 1 1 calc R . . 
C10 C 0.34059(13) -0.4502(3) -0.8185(3) 0.0328(6) Uani 1 1 d . . . 
C11 C 0.37096(14) -0.3472(3) -0.6899(3) 0.0366(7) Uani 1 1 d . . . 
C12 C 0.42232(17) -0.2385(4) -0.7383(4) 0.0663(10) Uani 1 1 d . . . 
H12B H 0.4002 -0.1830 -0.8198 0.099 Uiso 1 1 calc R . . 
H12C H 0.4599 -0.2924 -0.7647 0.099 Uiso 1 1 calc R . . 
H12A H 0.4388 -0.1723 -0.6606 0.099 Uiso 1 1 calc R . . 
C13 C 0.40566(17) -0.4300(4) -0.5565(3) 0.0633(10) Uani 1 1 d . . . 
H13B H 0.4273 -0.3607 -0.4863 0.095 Uiso 1 1 calc R . . 
H13C H 0.4393 -0.4960 -0.5829 0.095 Uiso 1 1 calc R . . 
H13A H 0.3722 -0.4855 -0.5164 0.095 Uiso 1 1 calc R . . 
C14 C 0.30440(17) -0.5847(3) -0.7681(4) 0.0564(9) Uani 1 1 d . . . 
H14B H 0.3370 -0.6453 -0.7077 0.085 Uiso 1 1 calc R . . 
H14C H 0.2835 -0.6406 -0.8504 0.085 Uiso 1 1 calc R . . 
H14A H 0.2700 -0.5526 -0.7146 0.085 Uiso 1 1 calc R . . 
C15 C 0.39683(14) -0.5083(3) -0.8954(3) 0.0366(6) Uani 1 1 d . . . 
H4A H 0.3397(13) -0.414(3) -1.203(2) 0.055 Uiso 1 1 d D . . 
H4B H 0.2775(10) -0.411(4) -1.291(3) 0.055 Uiso 1 1 d D . . 
 
loop_ 
 _atom_site_aniso_label 
 _atom_site_aniso_U_11 
 _atom_site_aniso_U_22 
 _atom_site_aniso_U_33 
 _atom_site_aniso_U_23 
 _atom_site_aniso_U_13 
 _atom_site_aniso_U_12 
Cd1 0.03171(13) 0.03202(13) 0.02838(13) 0.000 0.00573(8) 0.000 
O1 0.072(2) 0.0383(16) 0.0431(15) 0.0004(13) -0.0134(13) 0.0045(15) 
O2 0.0587(13) 0.079(2) 0.0408(11) 0.0092(10) 0.0148(9) 0.0392(12) 
O3 0.0507(13) 0.0653(15) 0.0359(11) 0.0033(10) 0.0133(9) 0.0172(11) 
O4 0.0646(16) 0.0686(17) 0.0477(14) 0.0161(12) 0.0014(11) -0.0168(14) 
N1 0.0443(14) 0.0438(15) 0.0342(14) -0.0022(11) 0.0013(10) -0.0114(12) 
N2 0.0511(11) 0.0322(15) 0.0294(9) 0.0004(16) 0.0027(8) -0.0048(19) 
C1 0.071(2) 0.0508(19) 0.0301(16) 0.0014(14) -0.0033(14) -0.0219(18) 
C2 0.077(2) 0.0460(19) 0.0405(18) 0.0068(15) -0.0039(15) -0.0241(18) 
C3 0.0492(18) 0.0492(19) 0.0304(15) 0.0005(14) 0.0031(12) -0.0142(15) 
C4 0.0476(18) 0.0415(17) 0.0345(15) -0.0001(13) 0.0031(13) -0.0149(14) 
C5 0.0392(16) 0.0378(16) 0.0325(15) -0.0069(12) 0.0036(12) -0.0055(14) 
C6 0.0336(12) 0.041(3) 0.0363(13) -0.0133(18) 0.0018(9) 0.0016(16) 
C7 0.0317(19) 0.036(2) 0.0384(19) -0.0077(16) 0.0069(14) -0.0006(16) 
C8 0.0407(17) 0.0515(19) 0.0417(17) -0.0133(14) -0.0051(13) 0.0118(15) 
C9 0.0457(18) 0.061(2) 0.0345(16) -0.0056(14) -0.0034(12) 0.0173(16) 
C10 0.0306(14) 0.0368(16) 0.0300(13) -0.0041(12) 0.0025(10) 0.0012(12) 
C11 0.0284(15) 0.0449(17) 0.0359(15) -0.0041(13) 0.0034(11) 0.0055(13) 
C12 0.046(2) 0.066(2) 0.092(3) -0.028(2) 0.0277(18) -0.0194(18) 
C13 0.056(2) 0.089(3) 0.0398(17) -0.0096(17) -0.0061(14) 0.032(2) 
C14 0.054(2) 0.048(2) 0.072(2) -0.0038(15) 0.0245(16) -0.0058(14) 
C15 0.0372(16) 0.0381(16) 0.0346(16) -0.0044(13) 0.0060(12) 0.0031(14) 
 
_geom_special_details 
; 
 All esds (except the esd in the dihedral angle between two l.s. planes) 
 are estimated using the full covariance matrix.  The cell esds are taken 
 into account individually in the estimation of esds in distances, angles 
 and torsion angles; correlations between esds in cell parameters are only 
 used when they are defined by crystal symmetry.  An approximate (isotropic) 
 treatment of cell esds is used for estimating esds involving l.s. planes. 
; 
 
loop_ 
 _geom_bond_atom_site_label_1 
 _geom_bond_atom_site_label_2 
 _geom_bond_distance 
 _geom_bond_site_symmetry_2 
 _geom_bond_publ_flag 
Cd1 O2 2.2227(18) 2_664 ? 
Cd1 O2 2.2227(18) 1_566 ? 
Cd1 N1 2.303(2) . ? 
Cd1 N1 2.303(2) 2_655 ? 
Cd1 O3 2.470(2) 2_664 ? 
Cd1 O3 2.470(2) 1_566 ? 
Cd1 C15 2.701(3) 2_664 ? 
Cd1 C15 2.701(3) 1_566 ? 
O1 C6 1.222(5) . ? 
O2 C15 1.259(3) . ? 
O2 Cd1 2.2226(18) 1_544 ? 
O3 C15 1.248(3) . ? 
O3 Cd1 2.470(2) 1_544 ? 
O4 H4A 0.818(17) . ? 
O4 H4B 0.829(17) . ? 
N1 C3 1.327(4) . ? 
N1 C2 1.341(4) . ? 
N2 C6 1.384(3) . ? 
N2 C5 1.384(4) . ? 
N2 H2 0.8600 . ? 
C1 C2 1.364(4) . ? 
C1 C5 1.385(4) . ? 
C1 H1 0.9300 . ? 
C2 H2A 0.9300 . ? 
C3 C4 1.373(4) . ? 
C3 H3 0.9300 . ? 
C4 C5 1.390(4) . ? 
C4 H4 0.9300 . ? 
C6 C7 1.507(6) . ? 
C7 C8 1.534(5) . ? 
C7 C11 1.568(5) . ? 
C7 H7 0.9800 . ? 
C8 C9 1.533(4) . ? 
C8 H8A 0.9700 . ? 
C8 H8B 0.9700 . ? 
C9 C10 1.525(4) . ? 
C9 H9A 0.9700 . ? 
C9 H9B 0.9700 . ? 
C10 C15 1.524(4) . ? 
C10 C14 1.531(4) . ? 
C10 C11 1.567(4) . ? 
C11 C13 1.524(4) . ? 
C11 C12 1.542(4) . ? 
C12 H12B 0.9600 . ? 
C12 H12C 0.9600 . ? 
C12 H12A 0.9600 . ? 
C13 H13B 0.9600 . ? 
C13 H13C 0.9600 . ? 
C13 H13A 0.9600 . ? 
C14 H14B 0.9600 . ? 
C14 H14C 0.9600 . ? 
C14 H14A 0.9600 . ? 
C15 Cd1 2.701(3) 1_544 ? 
 
loop_ 
 _geom_angle_atom_site_label_1 
 _geom_angle_atom_site_label_2 
 _geom_angle_atom_site_label_3 
 _geom_angle 
 _geom_angle_site_symmetry_1 
 _geom_angle_site_symmetry_3 
 _geom_angle_publ_flag 
O2 Cd1 O2 155.47(11) 2_664 1_566 ? 
O2 Cd1 N1 87.80(8) 2_664 . ? 
O2 Cd1 N1 109.18(8) 1_566 . ? 
O2 Cd1 N1 109.19(8) 2_664 2_655 ? 
O2 Cd1 N1 87.80(8) 1_566 2_655 ? 
N1 Cd1 N1 93.82(12) . 2_655 ? 
O2 Cd1 O3 54.95(6) 2_664 2_664 ? 
O2 Cd1 O3 108.81(8) 1_566 2_664 ? 
N1 Cd1 O3 141.81(8) . 2_664 ? 
N1 Cd1 O3 91.37(8) 2_655 2_664 ? 
O2 Cd1 O3 108.81(8) 2_664 1_566 ? 
O2 Cd1 O3 54.95(6) 1_566 1_566 ? 
N1 Cd1 O3 91.37(8) . 1_566 ? 
N1 Cd1 O3 141.81(8) 2_655 1_566 ? 
O3 Cd1 O3 107.29(11) 2_664 1_566 ? 
O2 Cd1 C15 27.50(7) 2_664 2_664 ? 
O2 Cd1 C15 134.28(8) 1_566 2_664 ? 
N1 Cd1 C15 114.81(9) . 2_664 ? 
N1 Cd1 C15 100.82(8) 2_655 2_664 ? 
O3 Cd1 C15 27.47(7) 2_664 2_664 ? 
O3 Cd1 C15 111.11(8) 1_566 2_664 ? 
O2 Cd1 C15 134.28(8) 2_664 1_566 ? 
O2 Cd1 C15 27.49(7) 1_566 1_566 ? 
N1 Cd1 C15 100.82(8) . 1_566 ? 
N1 Cd1 C15 114.81(9) 2_655 1_566 ? 
O3 Cd1 C15 111.11(8) 2_664 1_566 ? 
O3 Cd1 C15 27.47(7) 1_566 1_566 ? 
C15 Cd1 C15 127.21(12) 2_664 1_566 ? 
C15 O2 Cd1 97.92(16) . 1_544 ? 
C15 O3 Cd1 86.62(16) . 1_544 ? 
H4A O4 H4B 112(3) . . ? 
C3 N1 C2 116.0(2) . . ? 
C3 N1 Cd1 125.27(18) . . ? 
C2 N1 Cd1 118.63(19) . . ? 
C6 N2 C5 127.7(4) . . ? 
C6 N2 H2 116.1 . . ? 
C5 N2 H2 116.1 . . ? 
C2 C1 C5 118.8(3) . . ? 
C2 C1 H1 120.6 . . ? 
C5 C1 H1 120.6 . . ? 
N1 C2 C1 124.4(3) . . ? 
N1 C2 H2A 117.8 . . ? 
C1 C2 H2A 117.8 . . ? 
N1 C3 C4 124.2(3) . . ? 
N1 C3 H3 117.9 . . ? 
C4 C3 H3 117.9 . . ? 
C3 C4 C5 118.8(3) . . ? 
C3 C4 H4 120.6 . . ? 
C5 C4 H4 120.6 . . ? 
N2 C5 C1 124.5(3) . . ? 
N2 C5 C4 117.8(3) . . ? 
C1 C5 C4 117.7(2) . . ? 
O1 C6 N2 121.5(4) . . ? 
O1 C6 C7 124.0(2) . . ? 
N2 C6 C7 114.5(4) . . ? 
C6 C7 C8 113.1(3) . . ? 
C6 C7 C11 112.4(3) . . ? 
C8 C7 C11 106.4(3) . . ? 
C6 C7 H7 108.3 . . ? 
C8 C7 H7 108.3 . . ? 
C11 C7 H7 108.3 . . ? 
C9 C8 C7 106.0(3) . . ? 
C9 C8 H8A 110.5 . . ? 
C7 C8 H8A 110.5 . . ? 
C9 C8 H8B 110.5 . . ? 
C7 C8 H8B 110.5 . . ? 
H8A C8 H8B 108.7 . . ? 
C10 C9 C8 106.8(2) . . ? 
C10 C9 H9A 110.4 . . ? 
C8 C9 H9A 110.4 . . ? 
C10 C9 H9B 110.4 . . ? 
C8 C9 H9B 110.4 . . ? 
H9A C9 H9B 108.6 . . ? 
C15 C10 C9 114.0(2) . . ? 
C15 C10 C14 107.0(2) . . ? 
C9 C10 C14 110.1(2) . . ? 
C15 C10 C11 110.7(2) . . ? 
C9 C10 C11 103.1(2) . . ? 
C14 C10 C11 112.1(2) . . ? 
C13 C11 C12 109.0(3) . . ? 
C13 C11 C10 113.9(3) . . ? 
C12 C11 C10 110.0(2) . . ? 
C13 C11 C7 112.0(3) . . ? 
C12 C11 C7 110.5(3) . . ? 
C10 C11 C7 101.2(2) . . ? 
C11 C12 H12B 109.5 . . ? 
C11 C12 H12C 109.5 . . ? 
H12B C12 H12C 109.5 . . ? 
C11 C12 H12A 109.5 . . ? 
H12B C12 H12A 109.5 . . ? 
H12C C12 H12A 109.5 . . ? 
C11 C13 H13B 109.5 . . ? 
C11 C13 H13C 109.5 . . ? 
H13B C13 H13C 109.5 . . ? 
C11 C13 H13A 109.5 . . ? 
H13B C13 H13A 109.5 . . ? 
H13C C13 H13A 109.5 . . ? 
C10 C14 H14B 109.5 . . ? 
C10 C14 H14C 109.5 . . ? 
H14B C14 H14C 109.5 . . ? 
C10 C14 H14A 109.5 . . ? 
H14B C14 H14A 109.5 . . ? 
H14C C14 H14A 109.5 . . ? 
O3 C15 O2 120.4(2) . . ? 
O3 C15 C10 122.1(2) . . ? 
O2 C15 C10 117.4(2) . . ? 
O3 C15 Cd1 65.91(14) . 1_544 ? 
O2 C15 Cd1 54.59(13) . 1_544 ? 
C10 C15 Cd1 171.6(2) . 1_544 ? 
 
_diffrn_measured_fraction_theta_max    0.997 
_diffrn_reflns_theta_full              25.35 
_diffrn_measured_fraction_theta_full   0.997 
_refine_diff_density_max    0.252 
_refine_diff_density_min   -0.164 
_refine_diff_density_rms    0.040 
